# Supplementary material
Source: MDPI journal article supplement (https://www.mdpi.com/2076-3417/8/8/1333)
Supplement: s1 [file s1]

## Supplementary Material

**Article:** Single phase PV power injection limit due to voltage unbalances applied to an urban reference network using real time simulation

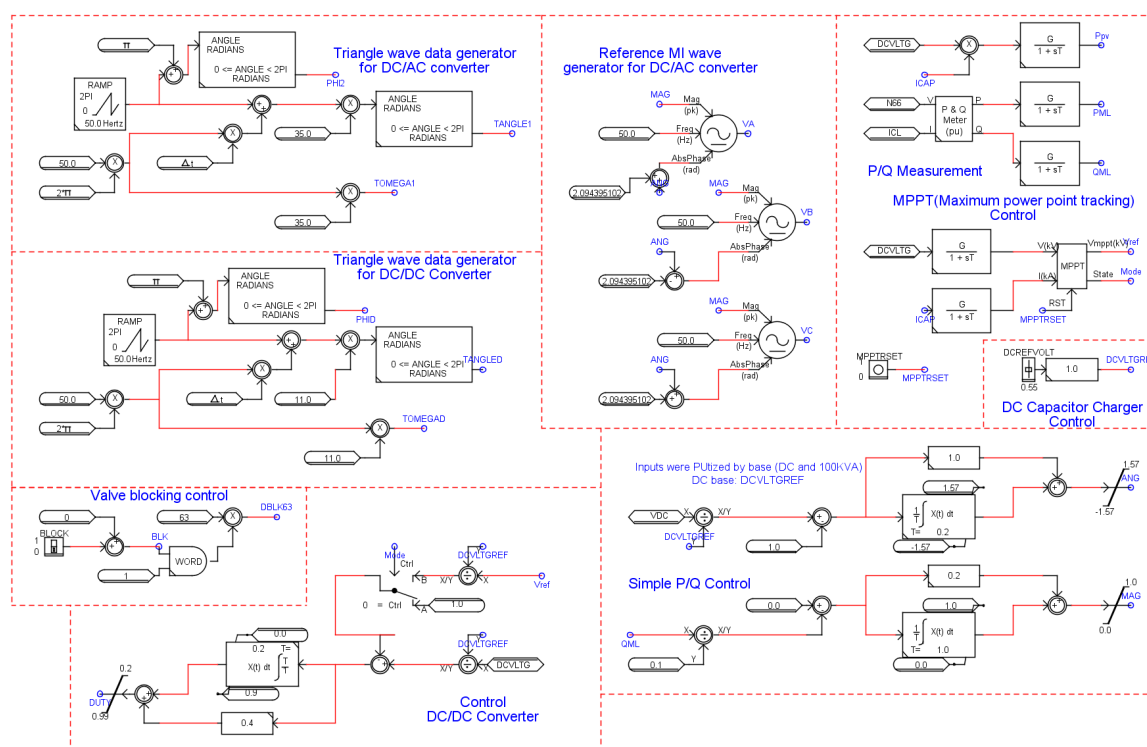

**Figure S1.** Block diagram implementation of the single phase PV control system developed in RSCAD.
